# Supplementary material for: Naked-eye and electrochemical detection of isothermally amplified HOTAIR long non-coding RNA
Source: Royal Society of Chemistry journal article supplement (doi:10.1039/c7an02109g), 2018-01-01
Supplement: c7an02109g1.pdf [file c7an02109g1.pdf]

**Electronic supplementary information (ESI)**

*for*

Naked-eye and electrochemical detection of isothermally amplified HOTAIR long  
non-coding RNA †

Md. Nazmul Islam,<sup>a,b</sup> Sofia Moriam,<sup>a</sup> Muhammad Umer,<sup>b</sup> Hoang-Phuong Phan,<sup>b</sup>  
Carlos Salomon,<sup>c,d,e</sup> Richard Kline,<sup>e</sup> Nam-Trung Nguyen,<sup>b</sup> Muhammad J. A. Shiddiky  
<sup>a,b,\*</sup>

<sup>a</sup>School of Environment and Science, Griffith University, Nathan Campus, Nathan,  
QLD 4111, Australia

<sup>b</sup>Queensland Micro- and Nanotechnology Centre (QMNC), Griffith University, Nathan  
Campus, Nathan, QLD 4111, Australia

<sup>c</sup>Exosome Biology Laboratory, Centre for Clinical Diagnostics, University of  
Queensland Centre for Clinical Research, Royal Brisbane and Women's Hospital, The  
University of Queensland, Brisbane QLD 4029, Australia.

<sup>d</sup>Department of Clinical Biochemistry and Immunology, Faculty of Pharmacy,  
University of Concepción, Concepción, Chile.

<sup>e</sup>Maternal-Fetal Medicine, Department of Obstetrics and Gynecology, Ochsner Clinic  
Foundation, New Orleans, USA.

\* Corresponding author email: m.shiddiky@griffith.edu.au

## Experimental

### Determination of surface area of electrodes

The effective areas of SPGE was determined by the measurement of the peak current obtained as a function of scan rate under cyclic voltammetric conditions for the one-electron reduction of  $[\text{Fe}(\text{CN})_6]^{3-}$  [2.0 mM  $\text{K}_3\text{Fe}(\text{CN})_6$  in 10 mM PBS (0.5 M KCl)] using the Randles- Sevcik equation (Eqn. S1), as shown before.<sup>1</sup>

$$i_p = (2.69 \times 10^5) n^{3/2} A D^{1/2} C \nu^{1/2} \dots \dots \dots \dots \text{(Eqn. S1)}$$

## Atomic Force Microscopy (AFM) Measurements

A Cypher scanning atomic force microscope (Asylum Research, Santa Barbara, CA) was used to image the samples (Fig S1). The cantilevers used were from Etalon series (TipsNano, Tallinn, Estonia) with a nominal Resonant frequency of 140 kHz. All the measurements were performed in tapping mode method at room temperature.

## RT-qPCR

The cDNA conversion was performed in a 20  $\mu$ L reaction using miScript Reverse Transcription kit (Qiagen, Germany) according to the manufacturer's instructions and the converted product was stored at - 20°C until further use. To verify the expression of HOTAIR, RT-qPCR was performed in a total reaction volume of 50  $\mu$ L containing 25  $\mu$ L of 2XSensiMix SYBR No-ROX master mix (Bioline, UK), 1.0  $\mu$ L each of 10  $\mu$ M primer, 3.0  $\mu$ L of cDNA at 5.0 ng/ $\mu$ L and 19  $\mu$ L of nuclease-free water. Thermal cycling was initiated with a first denaturation step at 95 °C for 10 min followed by 40 cycles of 95 °C for 15 s (denaturation), 55°C for 15 s (annealing), and 72 °C for 15 s (extension). All samples were run in triplicate and no template control was also included in the PCR assays.

**Table S1.** Patient sample information

| Sample id | Sample category | Diagnosis                                                      |
|-----------|-----------------|----------------------------------------------------------------|
| P1        | Cancer          | Mucinous borderline tumour, endocervical type, left ovary only |
| P2        | Cancer          | High-grade papillary serous carcinoma                          |
| P3        | Cancer          | Papillary Serous Carcinoma                                     |
| P4        | Benign          | Benign Mucinous Cystadenoma                                    |
| P5        | Benign          | Benign Haemorrhagic Cyst Left Ovary-Normal Right Ovary         |

A)

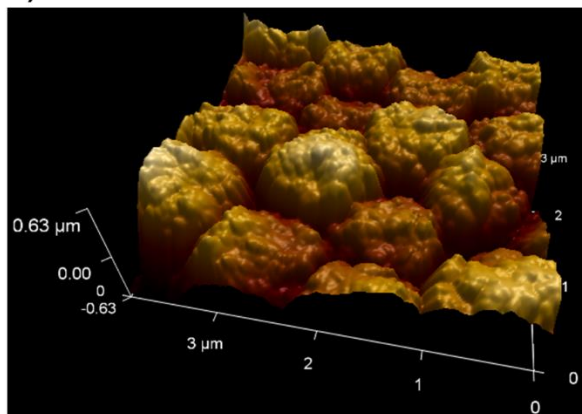

B)

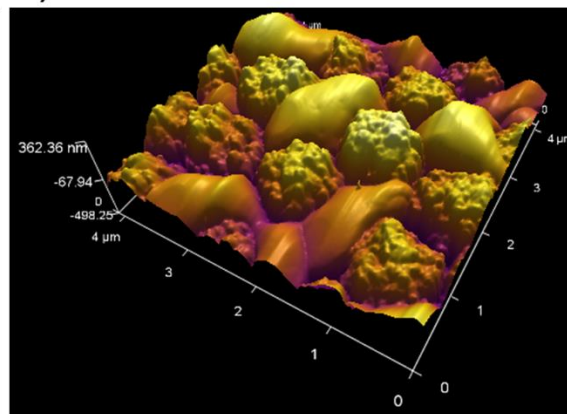

**Fig. S1.** Corresponding AFM 3D images of *A*) conjugates without RT-RPA amplified biotinylated target (dynabeads only), and *B*) biotinylated target amplicons/SA-HRP/SA-dynabeads complex.

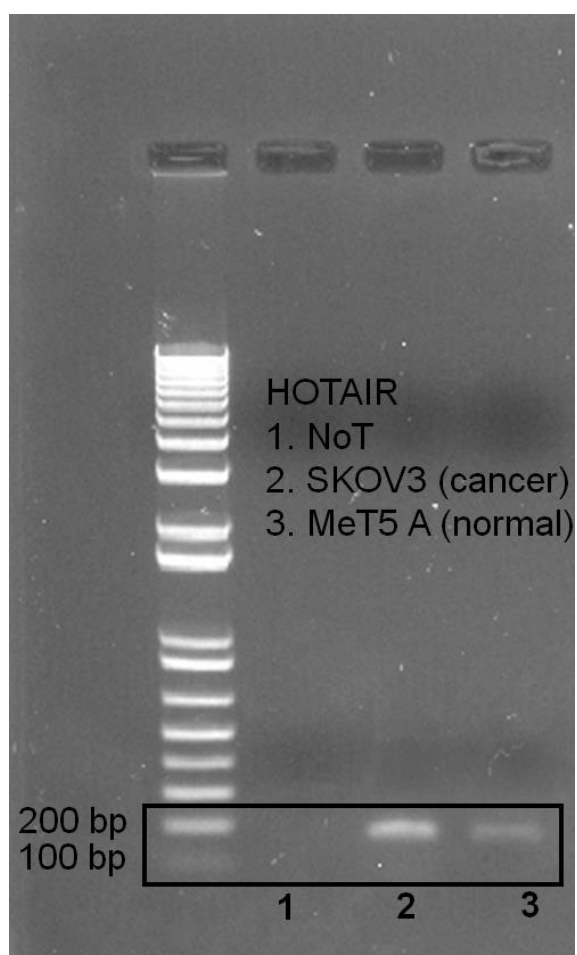

**Fig. S2.** Corresponding gel electrophoresis images after RT-RPA for NoT, and RNA amplicons derived from SKOV3 and Met-5A cell lines.

#### Notes and References

1. M. J. A. Shiddiky, A. A. Torriero, J. M. Reyna-Gonzalez and A. M. Bond, *Anal. Chem.*, 2010, **82**, 1680-1691.
